# Supplementary material
Source: PubMed Central journal article supplement (PMC7311055)
Supplement: ic0c00477_si_001.pdf [file ic0c00477_si_001.pdf]

# Rhenium-Imido Corroles

Abraham B. Alemayehu,<sup>a</sup> Simon J. Teat,<sup>b</sup> Sergey M. Borisov<sup>c</sup> and Abhik Ghosh<sup>\*,a</sup>

<sup>a</sup>Department of Chemistry, UiT – The Arctic University of Norway, N-9037 Tromsø, Norway; Email:  
abhik.ghosh@uit.no

<sup>b</sup>Advanced Light Source, Lawrence Berkeley National Laboratory,  
Berkeley, CA 94720-8229, USA

<sup>c</sup>Institute of Analytical Chemistry and Food Chemistry, Graz University of Technology,  
Stremayrgasse 9, 8010 Graz, Austria

| <b>Contents</b>               | <b>Page</b> |
|-------------------------------|-------------|
| A. <sup>1</sup> H NMR spectra | S2          |
| B. HR-ESI mass spectra        | S8          |
| C. Photophysical studies      | S14         |

**A. NMR spectra.**

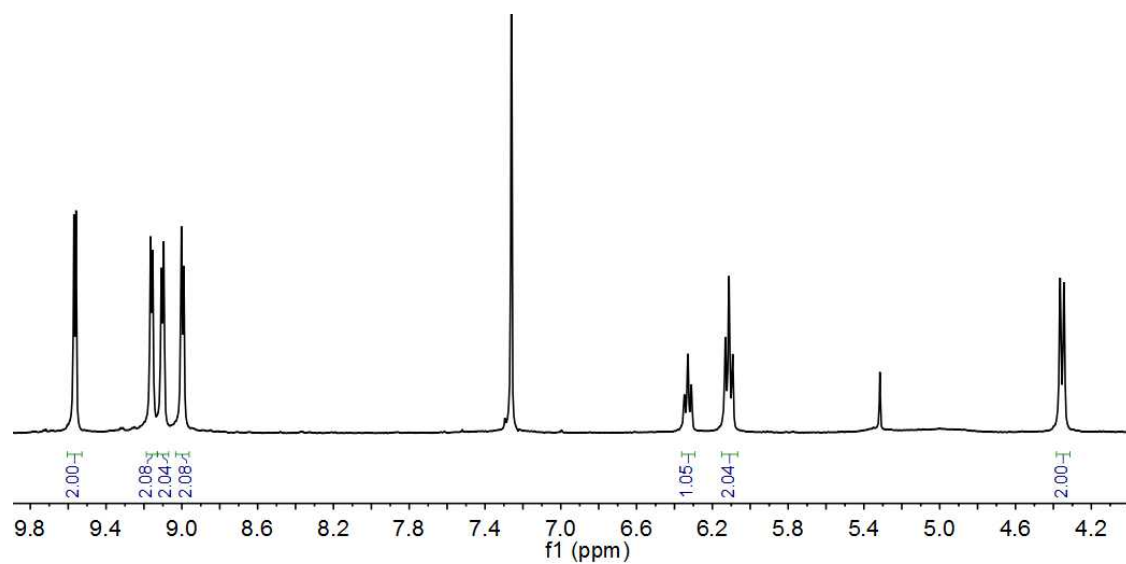

**Figure S1.**  $^1\text{H}$  NMR spectrum of  $\text{Re}[\text{TPFPC}](\text{NPh})$  in  $\text{CDCl}_3$  at 253 K.

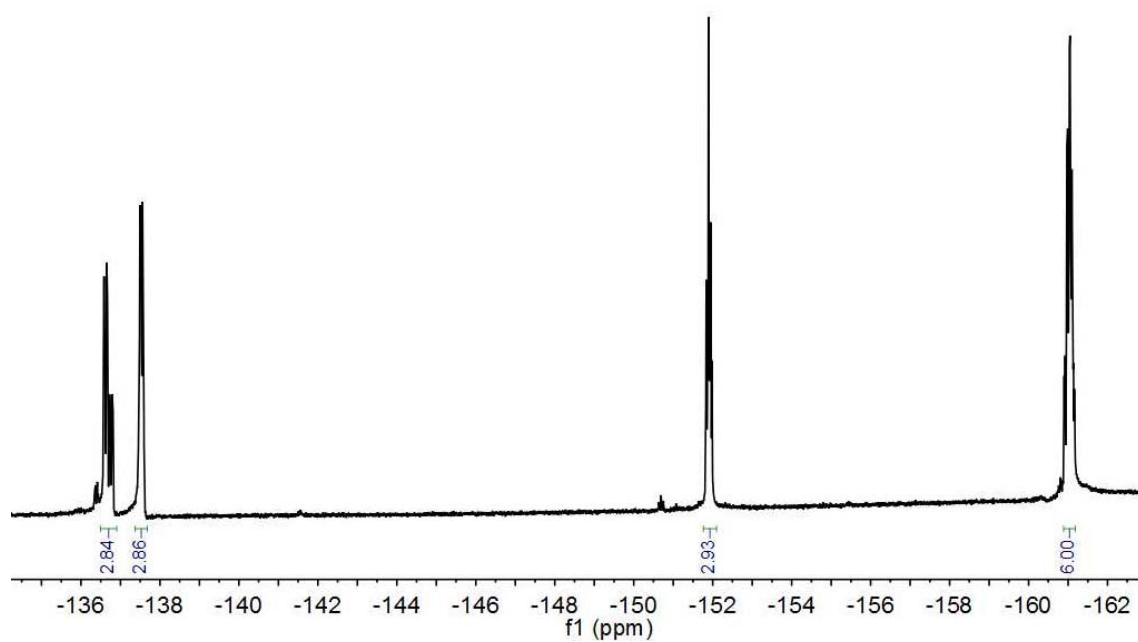

**Figure S2.**  $^{19}\text{F}$  NMR spectrum of  $\text{Re}[\text{TPFPC}](\text{NPh})$  in  $\text{CDCl}_3$  at 253 K.

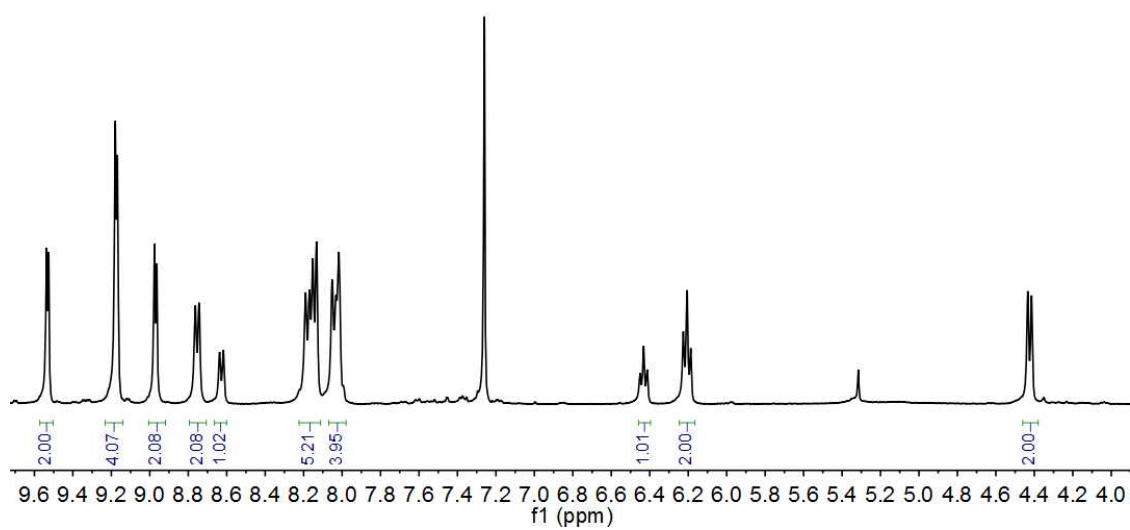

**Figure S3.**  $^1\text{H}$  NMR spectrum of  $\text{Re}[\text{TpCF}_3\text{PC}](\text{NPh})$  in  $\text{CDCl}_3$  at 253 K.

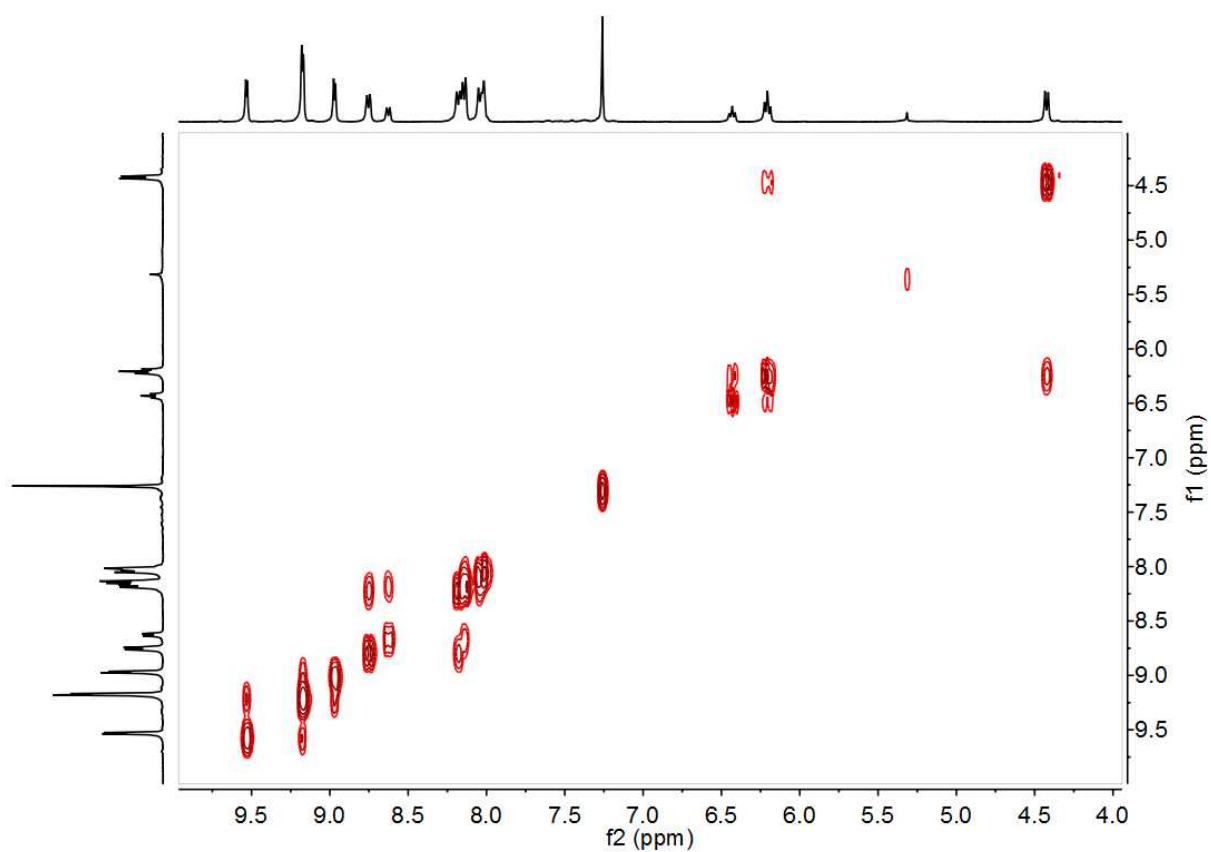

**Figure S4.**  $^1\text{H}$ - $^1\text{H}$  COSY of  $\text{Re}[\text{TpCF}_3\text{PC}](\text{NPh})$  in  $\text{CDCl}_3$  at 253 K.

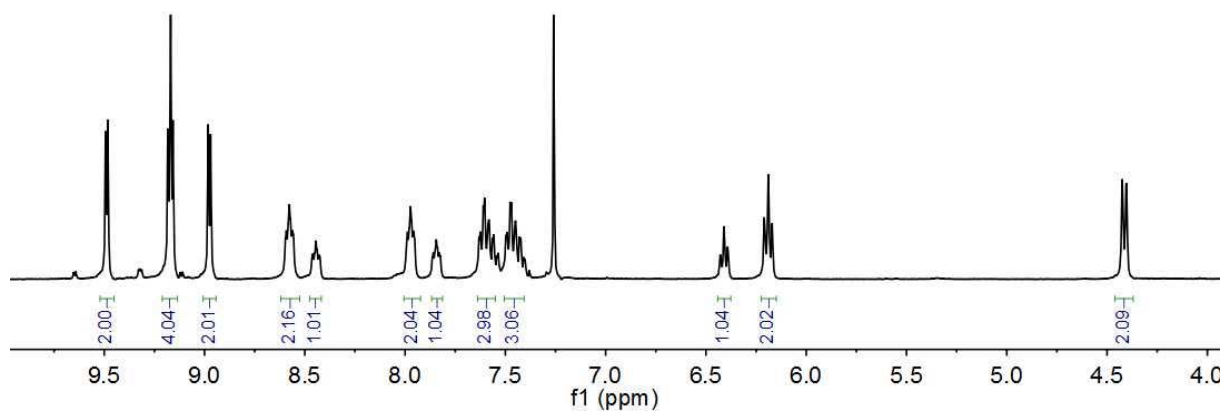

**Figure S5.**  $^1\text{H}$  NMR spectrum of  $\text{Re}[\text{TpFPC}](\text{NPh})$  in  $\text{CDCl}_3$  at 253 K.

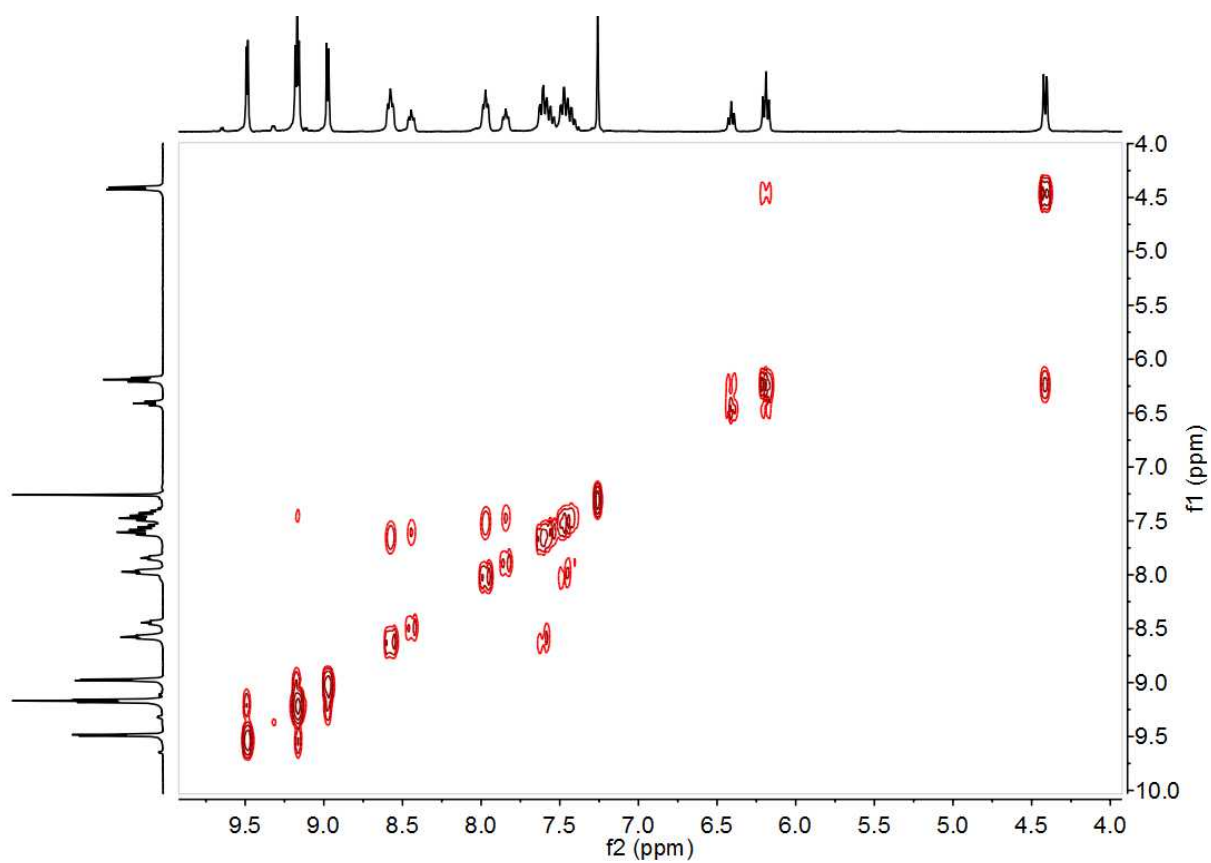

**Figure S6.**  $^1\text{H}$ - $^1\text{H}$  COSY of  $\text{Re}[\text{TpFPC}](\text{NPh})$  in  $\text{CDCl}_3$  at 253 K

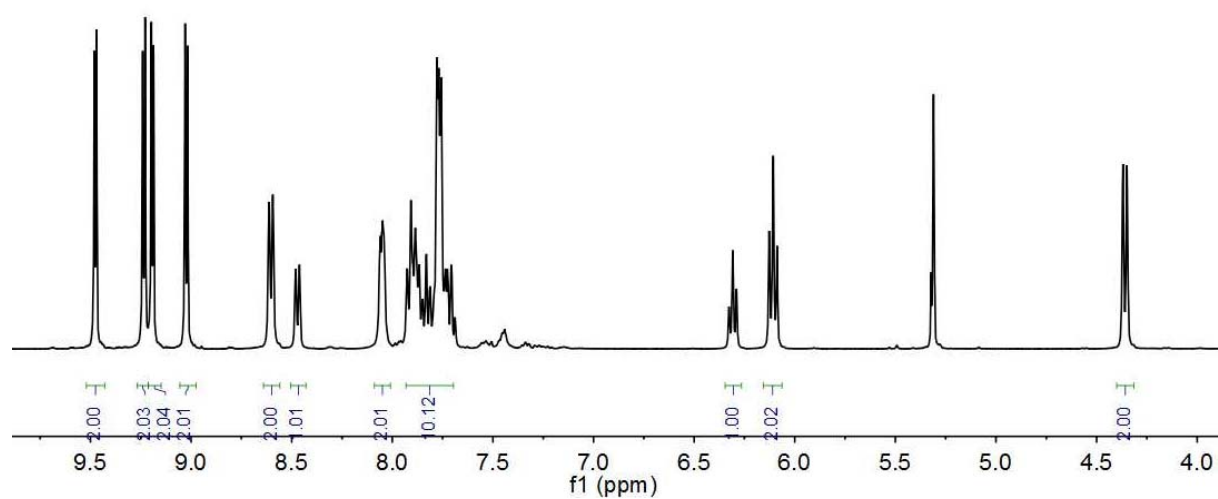

**Figure S7.**  $^1\text{H}$  NMR spectrum of  $\text{Re}[\text{TPC}](\text{NPh})$  in  $\text{CD}_2\text{Cl}_2$  at 253 K.

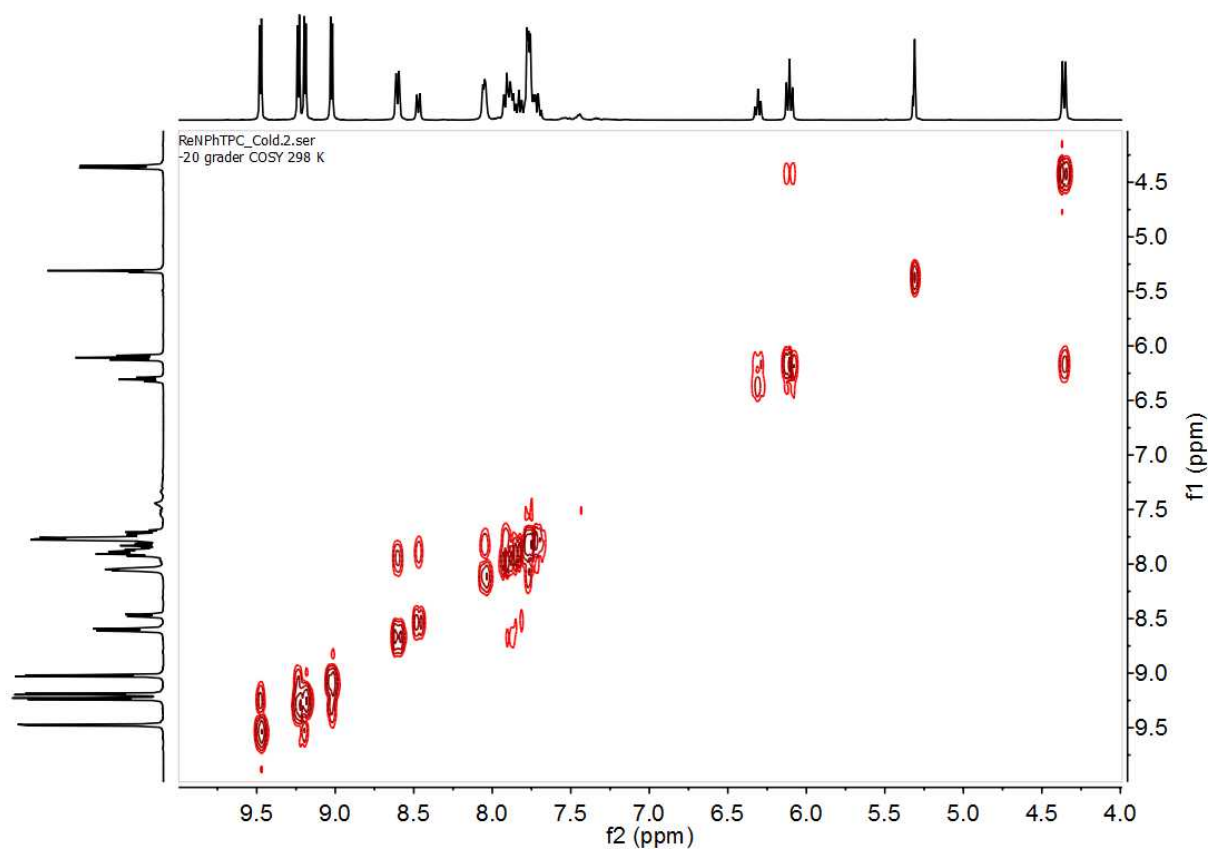

**Figure S8.**  $^1\text{H}$ - $^1\text{H}$  COSY of  $\text{Re}[\text{TPC}](\text{NPh})$  in  $\text{CD}_2\text{Cl}_2$  at 253 K.

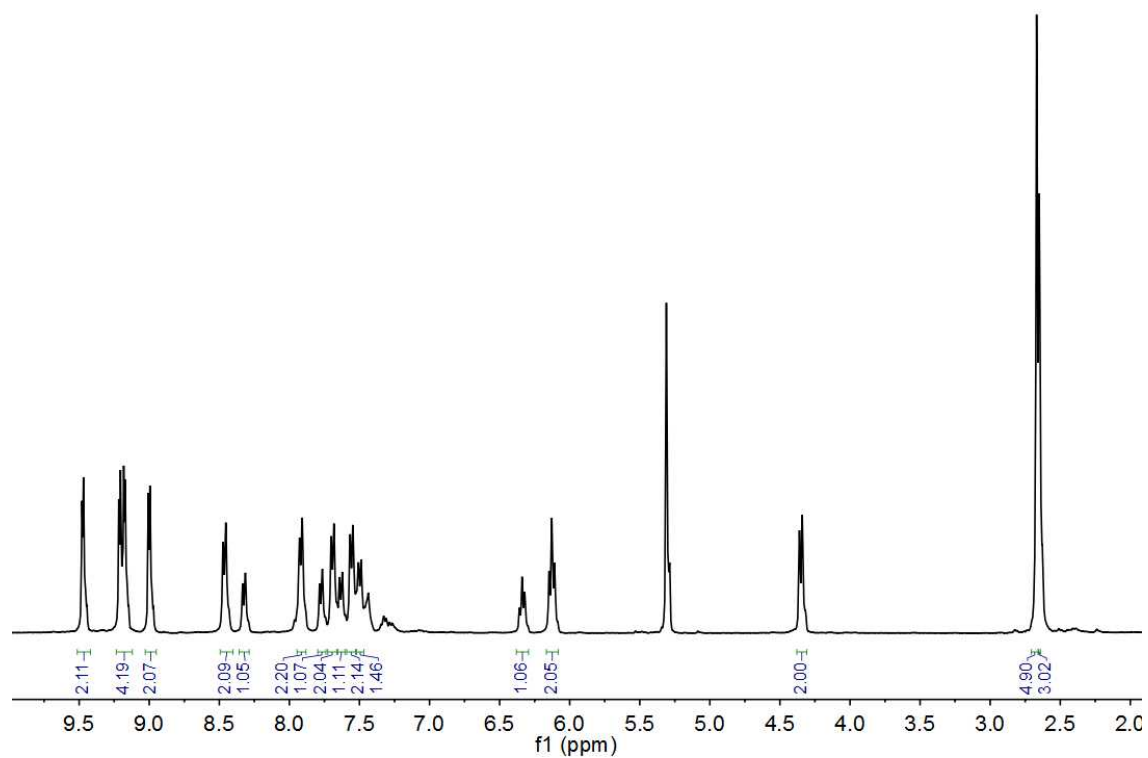

**Figure S9.**  $^1\text{H}$  NMR spectrum of  $\text{Re}[\text{TpCH}_3\text{PC}](\text{NPh})$  in  $\text{CD}_2\text{Cl}_2$  at 253 K.

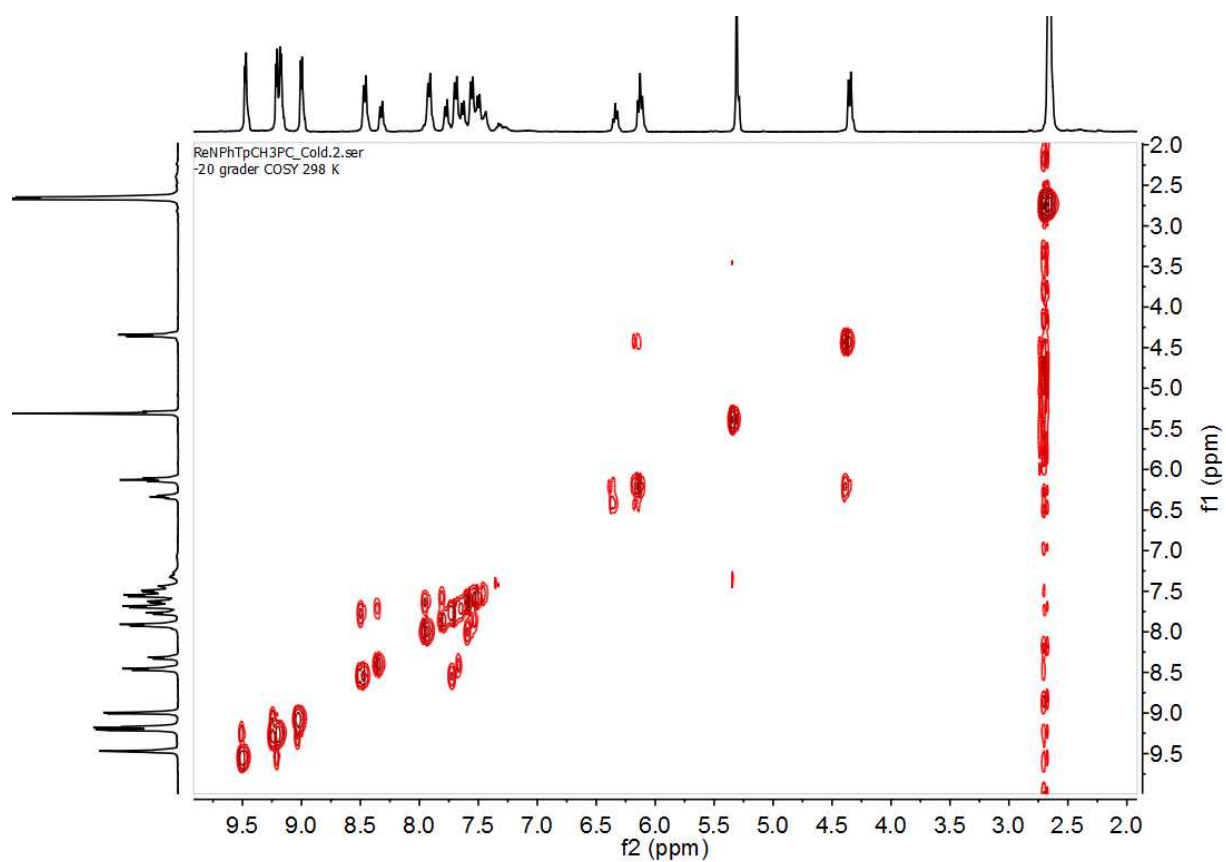

**Figure S10.**  $^1\text{H}$ - $^1\text{H}$  COSY of  $\text{Re}[\text{TpCH}_3\text{PC}](\text{NPh})$  in  $\text{CD}_2\text{Cl}_2$  at 253 K.

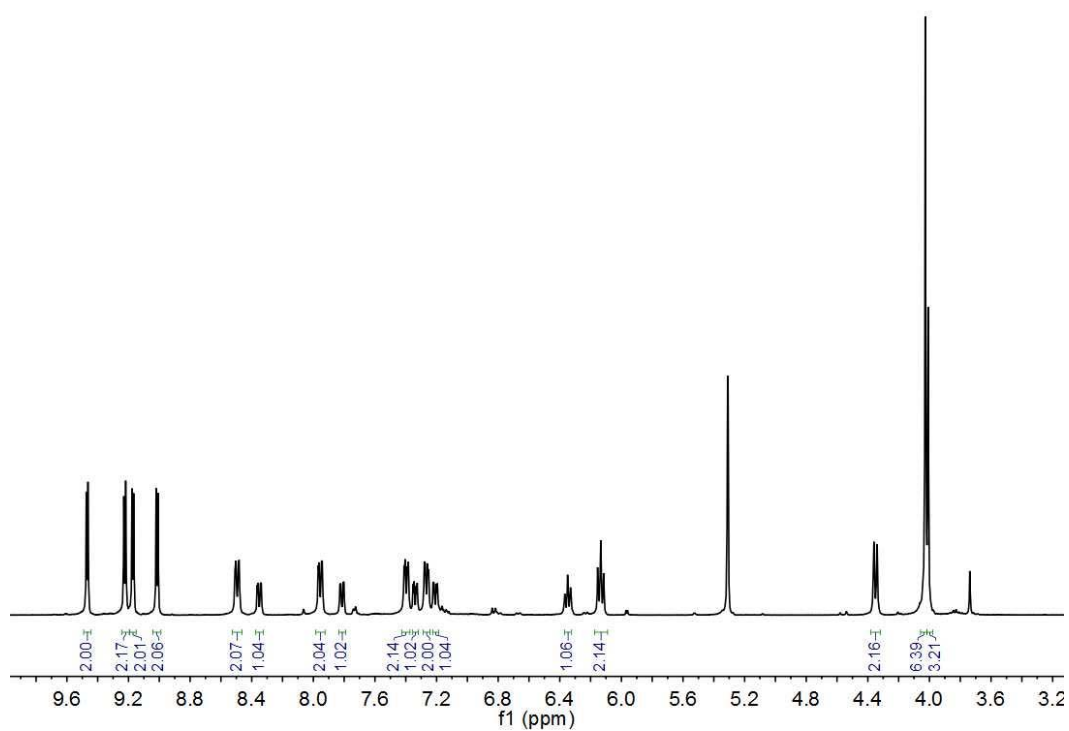

**Figure S11.**  $^1\text{H}$  NMR spectrum of  $\text{Re}[\text{TpOCH}_3\text{PC}](\text{NPh})$  in  $\text{CD}_2\text{Cl}_2$  at 253 K.

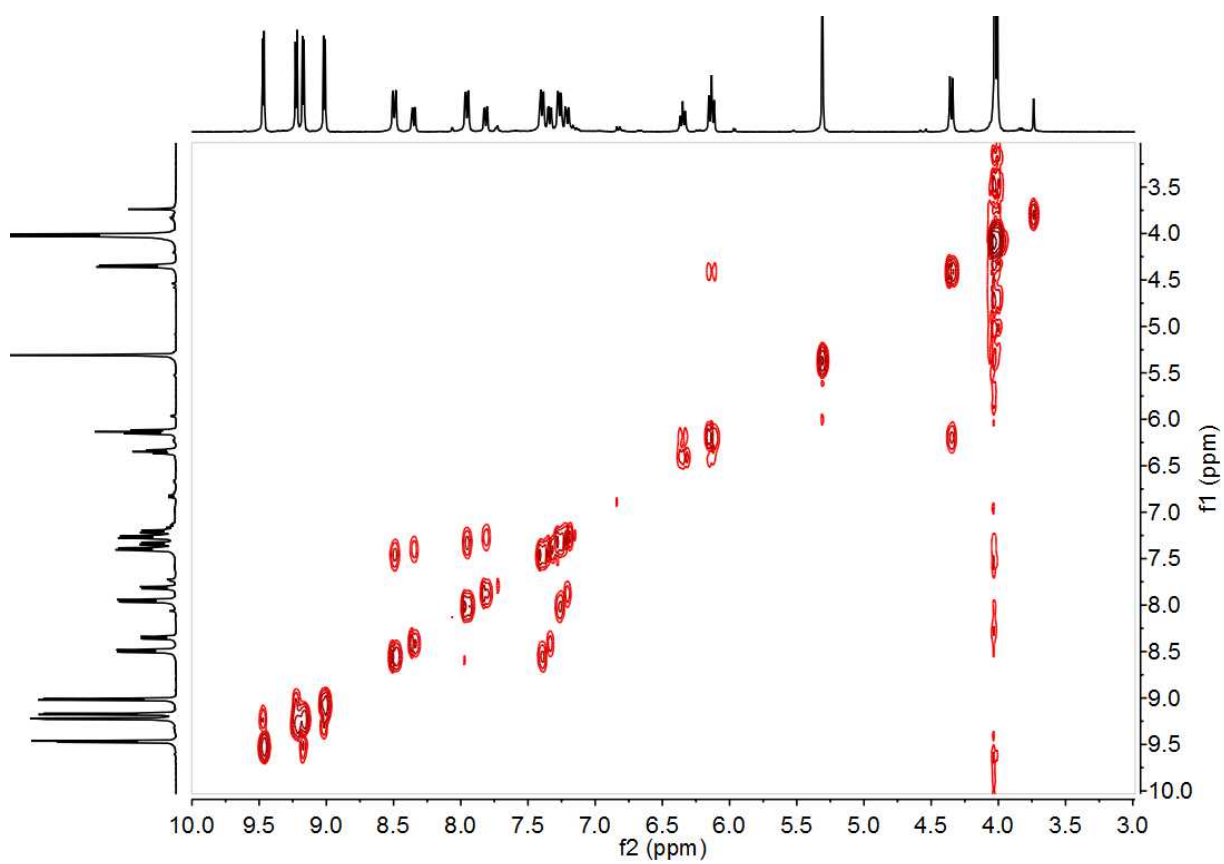

**Figure S12.**  $^1\text{H}$ - $^1\text{H}$  COSY of  $\text{Re}[\text{TpOCH}_3\text{PC}](\text{NPh})$  in  $\text{CD}_2\text{Cl}_2$  at 253 K.

## B. ESI mass spectra

ReNPhTPFPC-1\_pos #2-5 RT: 0.01-0.04 AV: 4 NL: 2.02E7  
T: FTMS + p ESI Full ms [200.00-2000.00]

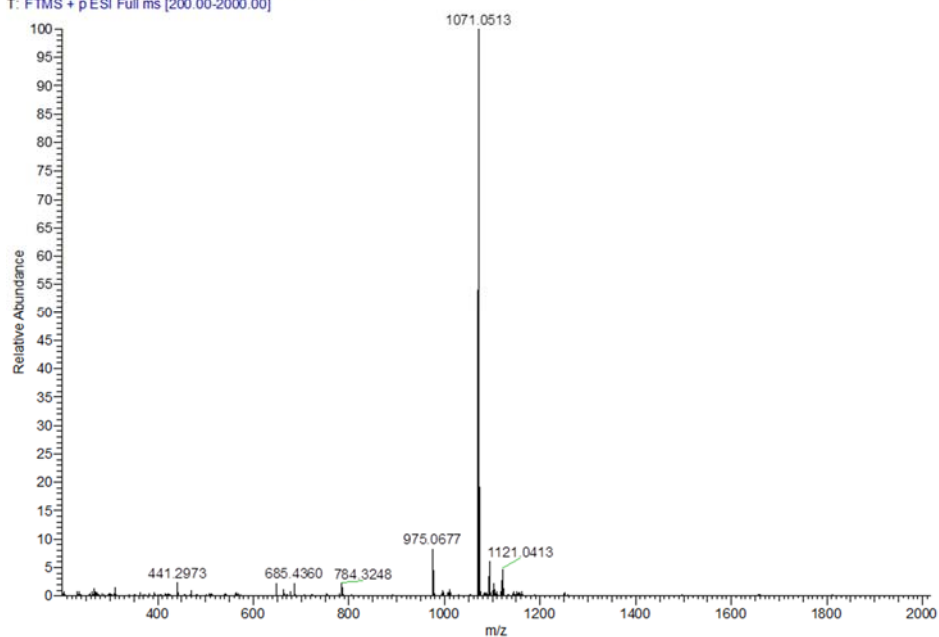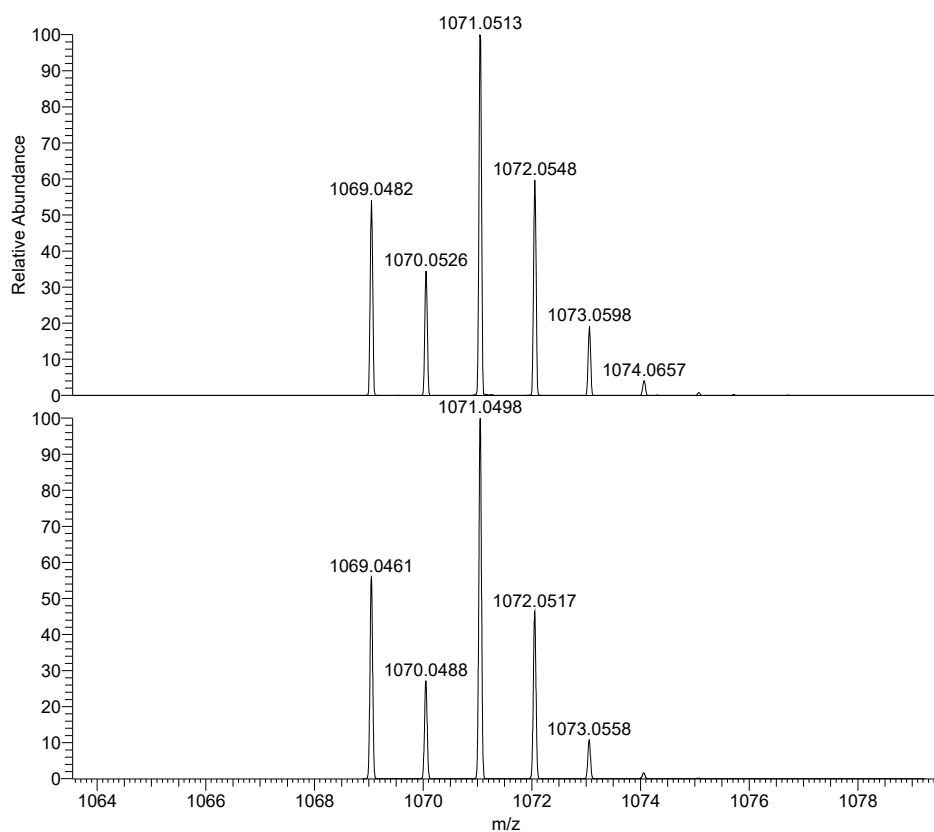

NL:  
2.02E7  
ReNPhTPFPC-1\_pos#2-5  
RT: 0.01-0.04 AV: 4 T: FTMS  
+ p ESI Full ms  
[200.00-2000.00]

NL:  
9.68E3  
C<sub>43</sub> H<sub>13</sub> F<sub>15</sub> N<sub>5</sub> Re:  
C<sub>43</sub> H<sub>13</sub> F<sub>15</sub> N<sub>5</sub> Re<sub>1</sub>  
p (gss, s /p:40) Chrg 0  
R: 20000 Res .Pwr . @FWHM

**Figure S13.** Positive mode ESI-MS of Re[TPFPC](NPh): experimental spectrum (top) and simulation (bottom).



ReNPhTpCF3PC-1\_pos #2-5 RT: 0.01-0.03 AV: 4 NL: 6.62E7  
T: FTMS + p ESI Full ms [200.00-2000.00]

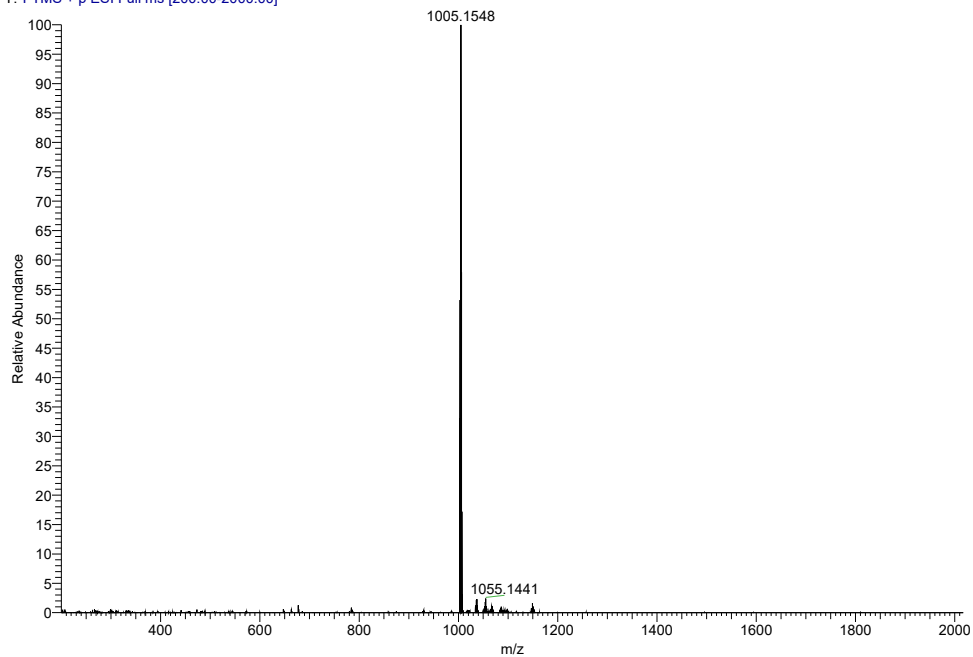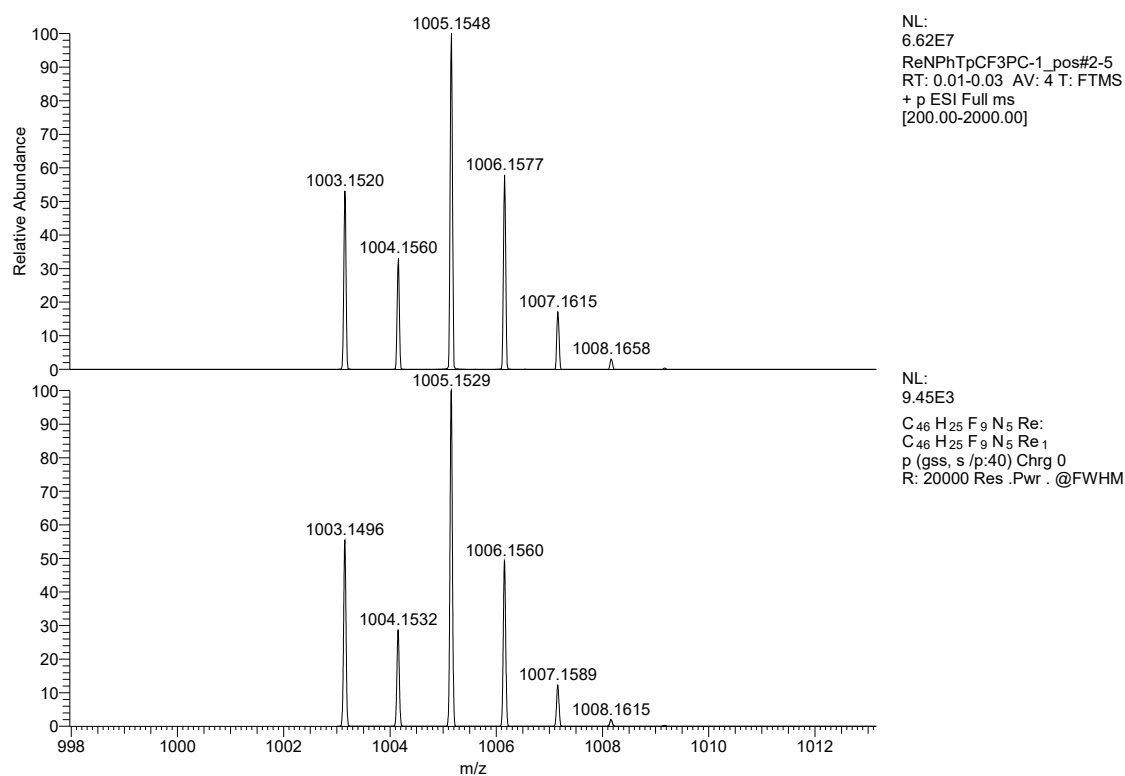

**Figure S14.** Positive mode ESI-MS of Re[*Tp*CF<sub>3</sub>PC](NPh): experimental spectrum (top) and simulation (bottom).

ReNPhTpFPC-1\_191004140524 #2-5 RT: 0.01-0.03 AV: 4 NL: 5.38E7  
T: FTMS + p ESI Full ms [200.00-2000.00]

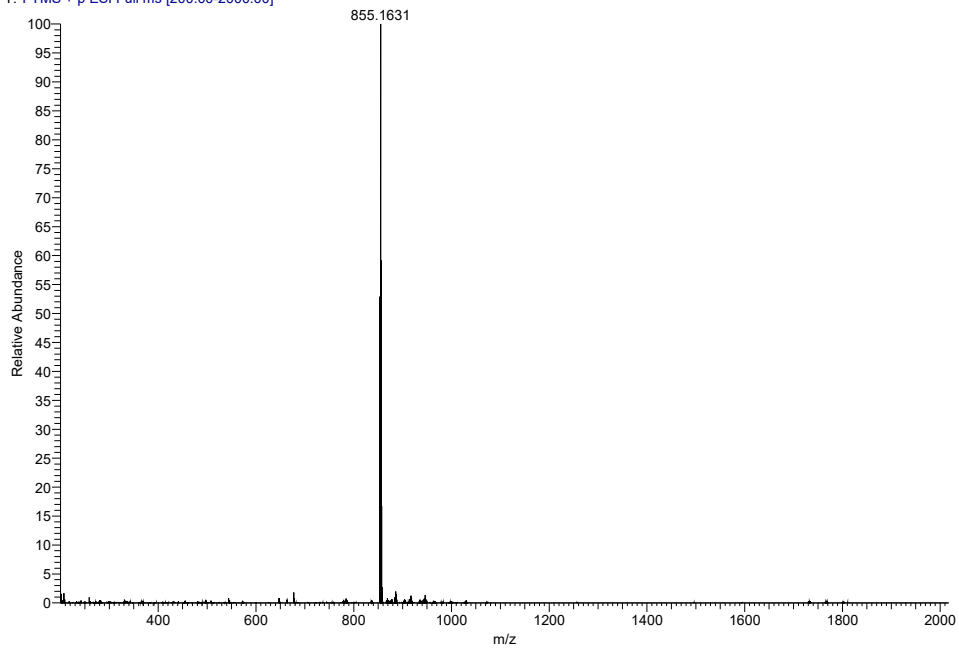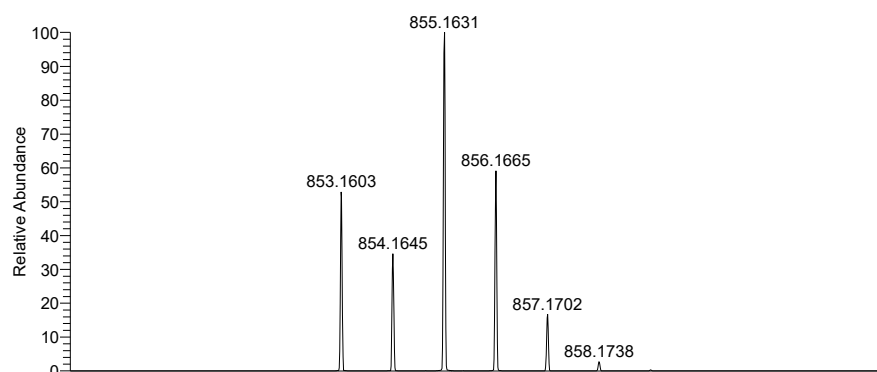

NL:  
5.38E7  
ReNPhTpFPC-  
1\_191004140524#2-5 RT:  
0.01-0.03 AV: 4 T: FTMS + p  
ESI Full ms [200.00-2000.00]

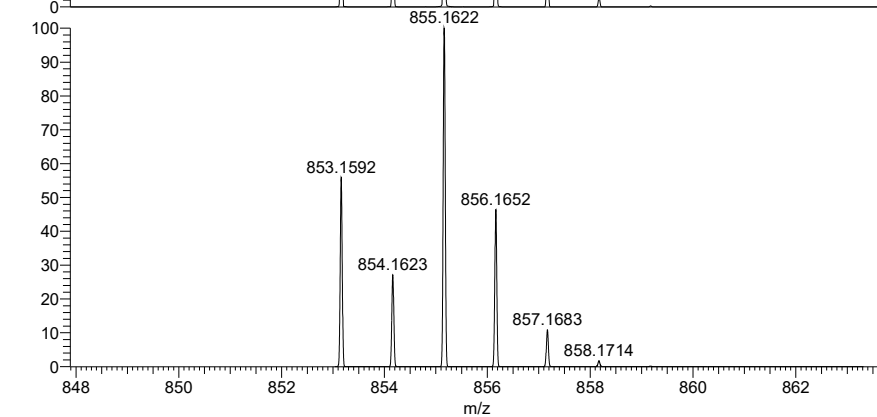

NL:  
9.67E3  
C<sub>43</sub> H<sub>25</sub> F<sub>3</sub> N<sub>5</sub> Re:  
C<sub>43</sub> H<sub>25</sub> F<sub>3</sub> N<sub>5</sub> Re<sub>1</sub>  
p (gss, s /p:40) Chrg 0  
R: 20000 Res .Pwr .@FWHM

**Figure S15.** Positive mode ESI-MS of Re[*Tp*FPC](NPh): experimental spectrum (top) and simulation (bottom).

ReNPhTPC-1\_191004140524 #2-5 RT: 0.01-0.05 AV: 4 NL: 2.80E7  
T: FTMS + p ESI Full ms [200.00-2000.00]

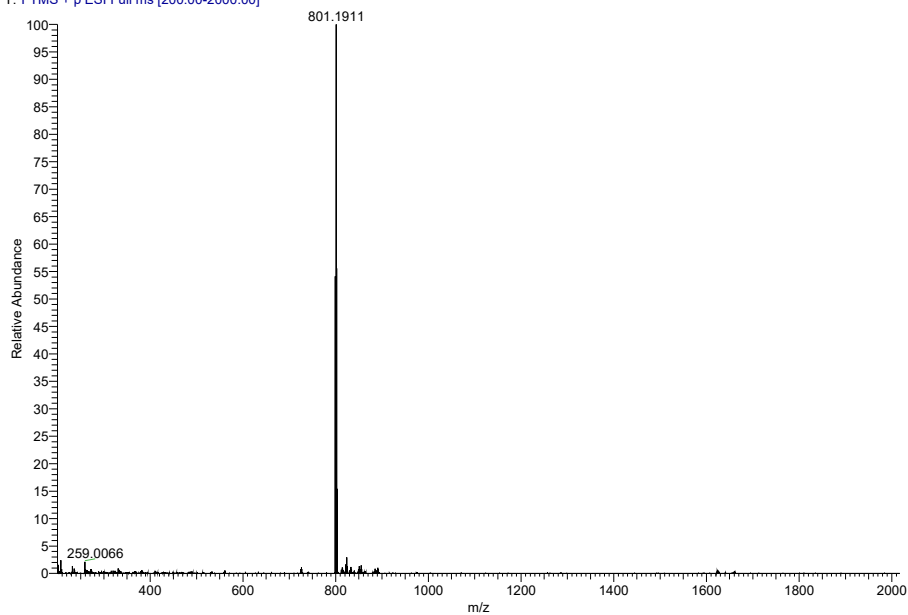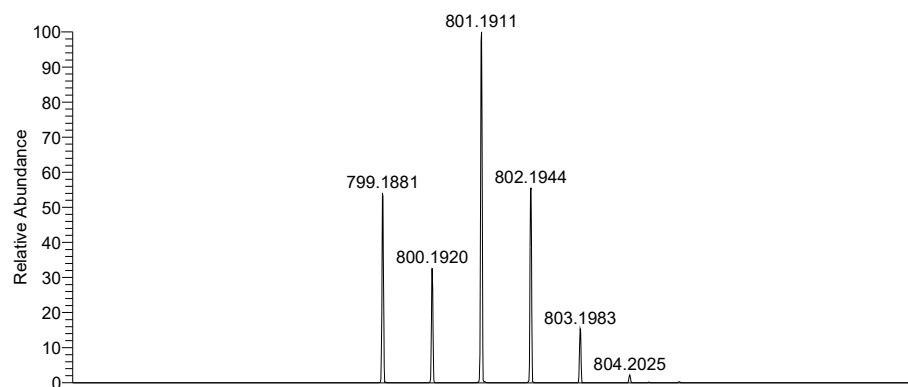

NL:  
2.80E7  
ReNPhTPC-  
1\_191004140524#2-5 RT:  
0.01-0.05 AV: 4 T: FTMS + p  
ESI Full ms [200.00-2000.00]

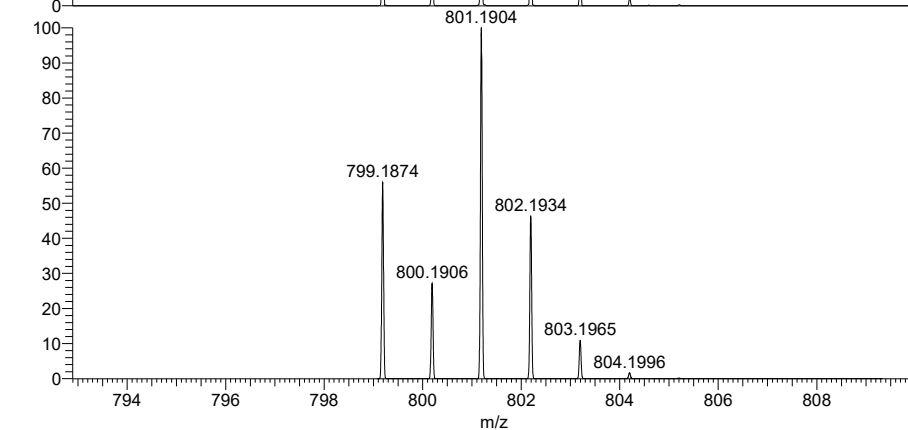

NL:  
9.66E3  
C<sub>43</sub> H<sub>28</sub> N<sub>5</sub> Re:  
C<sub>43</sub> H<sub>28</sub> N<sub>5</sub> Re<sub>1</sub>  
p (gss, s /p:40) Chrg 0  
R: 20000 Res .Pwr . @FWHM

**Figure S16.** Positive mode ESI-MS of Re[TPC](NPh): experimental spectrum (top) and simulation (bottom).

ReNPhTpCH3PC-1\_191004140524 #1-5 RT: 0.01-0.05 AV: 5 NL: 5.99E7  
T: FTMS + p ESI Full ms [200.00-2000.00]

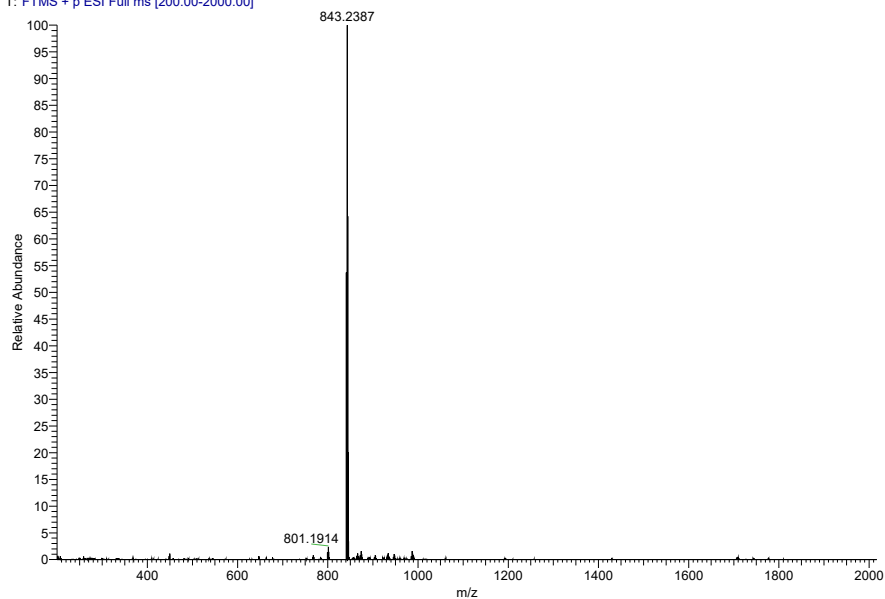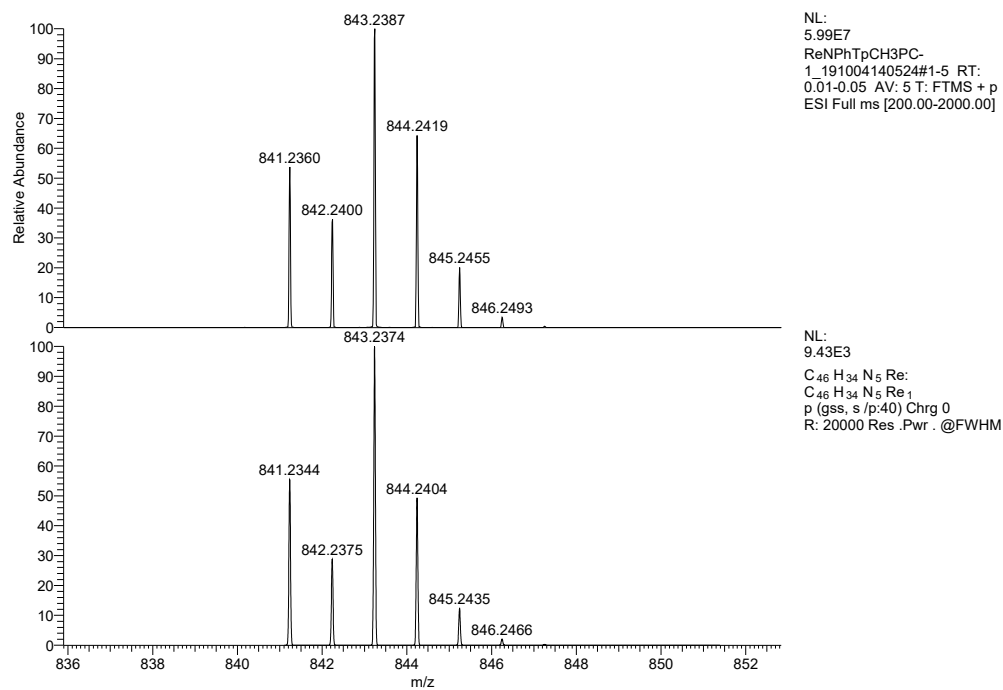

**Figure S17.** Positive mode ESI-MS of Re[*Tp*CH<sub>3</sub>PC](NPh): experimental spectrum (top) and simulation (bottom).

ReNPhTpOCH3PC-1 191004140524 #2-6 RT: 0.01-0.04 AV: 5 NL: 4.47E7  
T: FTMS + p ESI Full ms [200.00-2000.00]

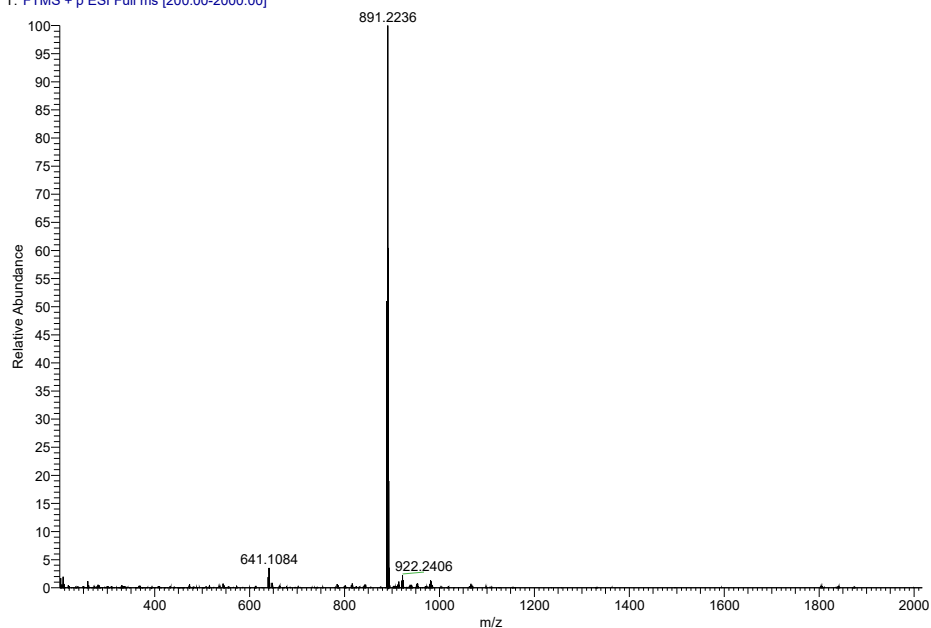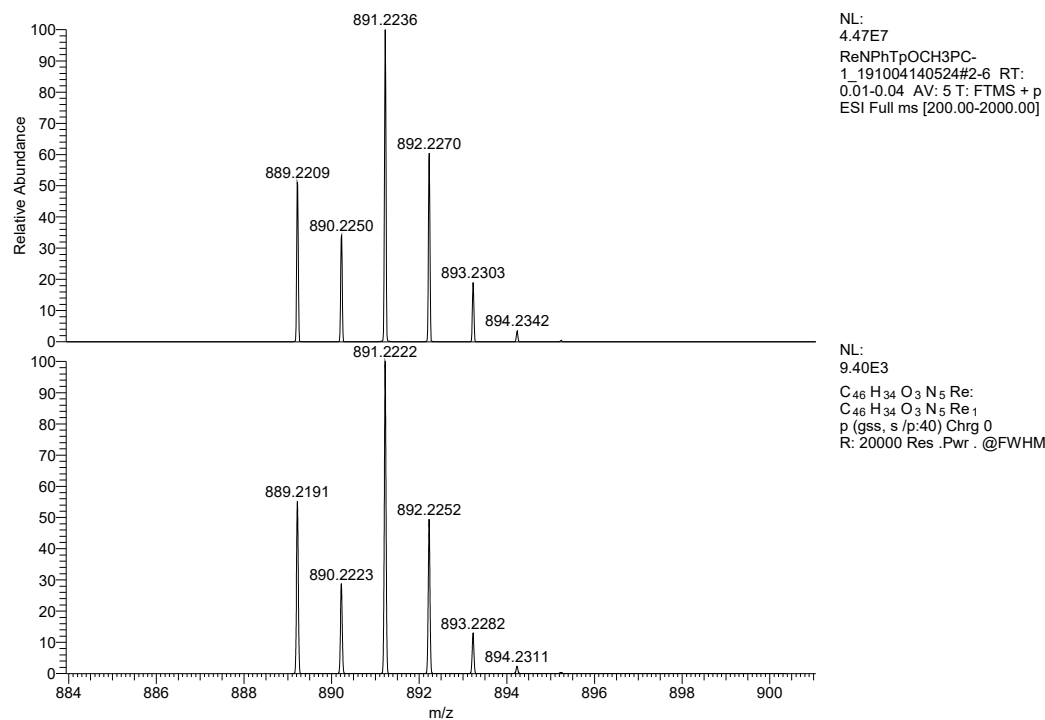

**Figure S18.** Positive mode ESI-MS of Re[*Tp*OCH<sub>3</sub>PC](NPh): experimental spectrum (top) and simulation (bottom).

### C. Photophysical Studies

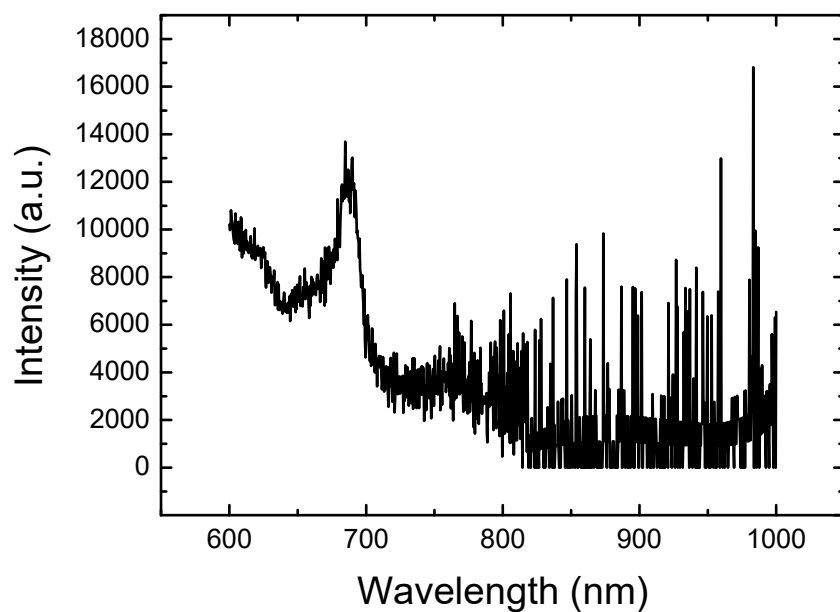

**Figure S19.** Emission spectrum of Re[TPC](NPh) in anoxic toluene at RT upon 570 nm excitation. An RG 610 filter was used to eliminate the second order artefact. No phosphorescence from the corrole is visible.

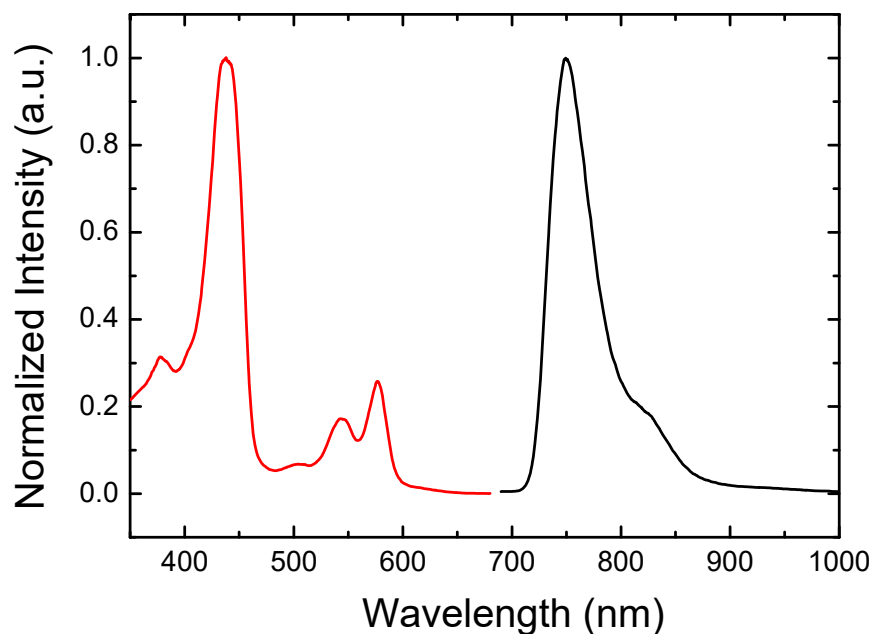

**Figure S20.** Excitation (red line,  $\lambda_{em} = 765$  nm) and emission spectra (black line,  $\lambda_{exc} = 440$  nm) of Re[TpCF<sub>3</sub>PC](NPh) in a 4:6 v/v toluene:THF frozen glass at 77K.

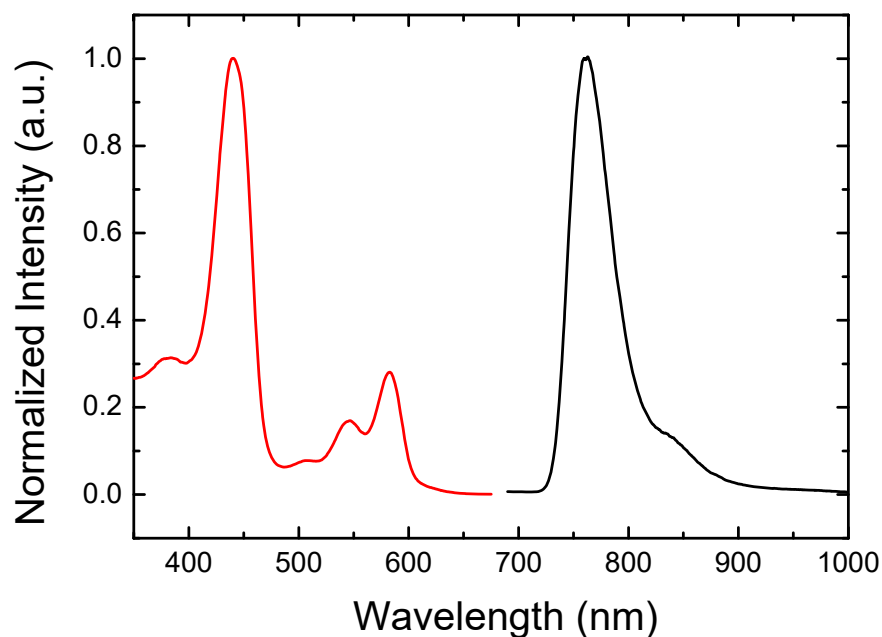

**Figure S21.** Excitation (red line,  $\lambda_{em} = 765$  nm) and emission spectra (black line,  $\lambda_{exc} = 440$  nm) of Re[TpOCH<sub>3</sub>PC](NPh) in toluene:THF 4:6 v/v frozen glass at 77K.

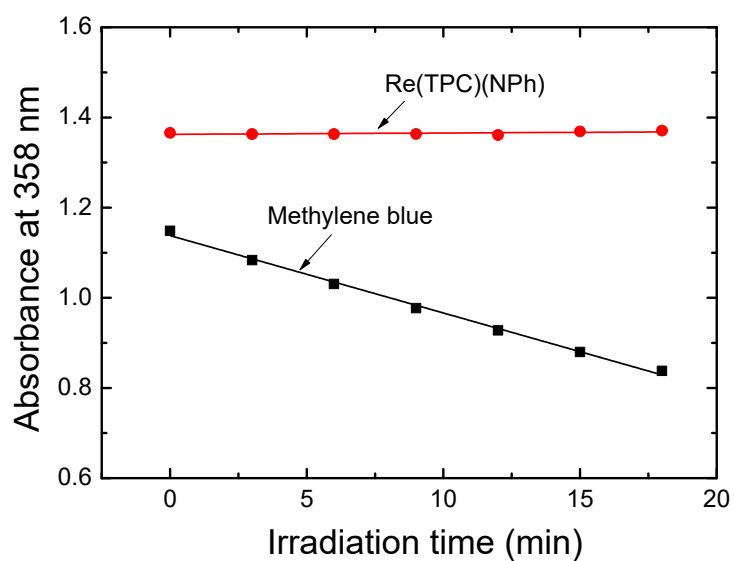

**Figure S22.** Investigation of singlet oxygen generation by Re(TPC)(NPh) in ethanol using 9,10-dimethylantracene as a singlet oxygen acceptor and methylene blue as a standard ( $\Phi(^1O_2) = 0.48$ ). Excitation of both sensitizers is performed at 575 nm. No generation of  $^1O_2$  by Re(TPC)(NPh) is visible.

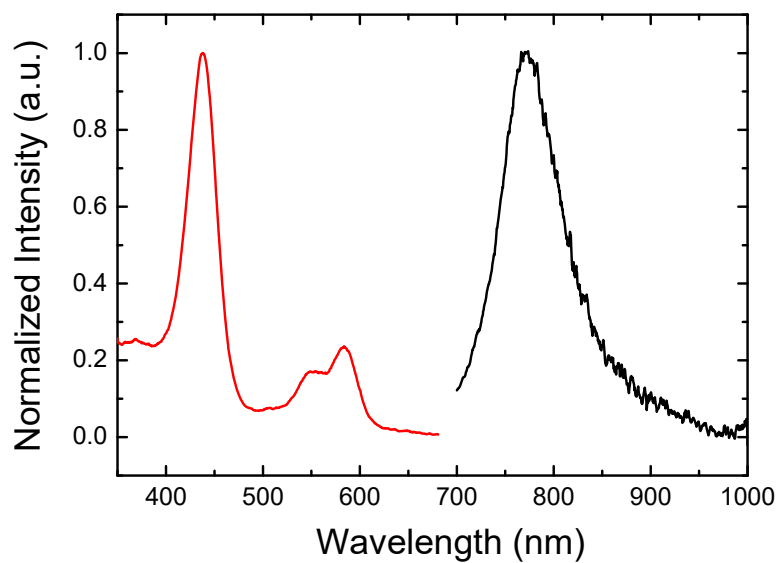

**Figure S23.** Excitation (red line,  $\lambda_{em} = 775$  nm) and emission spectrum (black line,  $\lambda_{exc} = 580$  nm) of Re(TPC)(NPh) in polystyrene (anoxic conditions, room temperature).
